# Supplementary material for: Phosphorylation of PACSIN2 at S313 Regulates Podocyte Architecture in Coordination with N-WASP
Source: MDPI journal article supplement (doi:10.3390/cells12111487), 2023-05-27
Supplement: s1 [file s1]

Supplementary Information for

# Phosphorylation of PACSIN2 at S313 Regulates Podocyte Architecture in Coordination with N-WASP

Rim Bouslama <sup>1,†</sup>, Vincent Dumont <sup>1,†</sup>, Sonja Lindfors <sup>1</sup>, Lassi Paavolainen <sup>2</sup>, Jukka Tienari <sup>3</sup>, Harry Nisen <sup>4</sup>, Tuomas Mirtti <sup>5,6</sup>, Moin A. Saleem <sup>7</sup>, Daniel Gordin <sup>8,9,10</sup>, Per-Henrik Groop <sup>1,11,12,13</sup>, Shiro Suetsugu <sup>14,15,16</sup> and Sanna Lehtonen <sup>1,17,\*</sup>

<sup>1</sup> Research Program for Clinical and Molecular Metabolism, Faculty of Medicine, University of Helsinki, 00290 Helsinki, Finland

<sup>2</sup> Institute for Molecular Medicine Finland (FIMM), Helsinki Institute of Life Science (HiLIFE), University of Helsinki, 00290 Helsinki, Finland

<sup>3</sup> Department of Pathology, University of Helsinki, Helsinki, and Helsinki University Hospital, 05850 Hyvinkää, Finland

<sup>4</sup> Department of Urology, Helsinki University Hospital, 00029 HUS, Finland; nisehar@gmail.com

<sup>5</sup> Department of Pathology, Helsinki University Hospital, 00290 Helsinki, Finland

<sup>6</sup> Research Program in Systems Oncology, Faculty of Medicine, University of Helsinki, 00290 Helsinki, Finland

<sup>7</sup> Children's Renal Unit, Bristol Medical School, University of Bristol, Bristol BS8 1TS, UK

<sup>8</sup> Minerva Foundation Institute for Medical Research, 00290 Helsinki, Finland

<sup>9</sup> Abdominal Center, Nephrology, University of Helsinki and Helsinki University Hospital, 00290 Helsinki, Finland

<sup>10</sup> Joslin Diabetes Center, Harvard Medical School, Boston, MA 02215, USA

<sup>11</sup> Folkhälsan Institute of Genetics, Folkhälsan Research Center, 00290 Helsinki, Finland

<sup>12</sup> Department of Nephrology, University of Helsinki and Helsinki University Hospital, 00290 Helsinki, Finland

<sup>13</sup> Department of Diabetes, Central Clinical School, Monash University, Melbourne, VIC 3800, Australia

<sup>14</sup> Division of Biological Science, Graduate School of Science and Technology, Nara Institute of Science and Technology, Ikoma 630-0192, Japan

<sup>15</sup> Data Science Center, Nara Institute of Science and Technology, Ikoma 630-0192, Japan

<sup>16</sup> Center for Digital Green-Innovation, Nara Institute of Science and Technology, Ikoma 630-0192, Japan

<sup>17</sup> Department of Pathology, University of Helsinki, 00290 Helsinki, Finland

\* Correspondence: sanna.h.lehtonen@helsinki.fi; Tel.: +358-50-4482798

† These authors contributed equally to this work.

**This document file includes:**

Supplementary Materials: Sequencing results of the overexpression constructs  
Tables S1 to S5  
Figure S1 to S4

### Sequencing results of the overexpression constructs

#### Notes:

ATG (met) for both myc and PACSIN2, as well as TGA (stop) are in bold.

The nucleotides that differ between the wt, S313E and S313A constructs are underlined.

Nucleotides coding myc are shown in italic. The remaining nucleotides from the multiple cloning site are in smaller font.

#### myc-PACSIN2-wt sequence:

**ATGGCATCAATGCAGAAGCTGATCTCAGAGGAGGACCTG**CTTATGGCCATGGAGGCCCGAATTCTA**ATGTCT**  
 GTCACCTACGATGACTCTGTGGGAGTGGAAGTGTCCAGCGACAGCTTCTGGGAGGTTGGGAAC  
 TACAAACGGACTGTGAAGCGGATTGACGATGGCCACCGCCTGTGTGGTGACCTCATGAACTGT  
 CTGCATGAGCGGGCACGCATCGAGAAGGCGTATGCACAGCAGCTCACTGAGTGGGCCCCGACGC  
 TGGAGGCAGCTGGTAGAGAAGGGACCACAGTATGGGACCGTGGAGAAGGCCTGGATAGCTGT  
 CATGTCTGAAGCAGAGAGGGTGAGTGAAGTGCACCTGGAAGTGAAGGCATCACTGATGAATG  
 AAGACTTTGAGAAGATCAAGAACTGGCAGAAGGAAGCCTTTCACAAGCAGATGATGGGAGGC  
 TTCAAGGAGACCAAAGAAGCAGAGGATGGCTTTCGGAAGGCCCGAGAAGCCCTGGGCCAAGAA  
 GCTGAAAGAGGTGGAAGCGGCAAAGAAGGCGCACACAGCGTGCAAAGAGGAGAAGCTG  
 GCCATCTCCCGGGAAGCCAACAGCAAGGCAGATCCATCCCTCAACCCTGAGCAGCTGAAGAAA  
 CTGCAAGACAAGATAGAAAAATGCAAACAGGATGTTCTAAAGACCAAGGACAAGTATGAGAA  
 GTCCCTGAAGGAGCTTGATCAGACCACACCCCAGTACATGGAGAACATGGAGCAGGTGTTCTGA  
 GCAGTGCCAGCAGTTTGAAGAGAAGCGCCTGCGCTTCTTCCGGGAGGTTCTGCTGGAGGTTCA  
 GAAGCACTTGATCTGTCCAATGTGGCTAGCTATAAAACCATTTACCGGGAGCTGGAGCAGAG  
 CATCAAAGCAGCAGATGCGGTAGAGGACCTGAGGTGGTTCCGGGCTAACCATGGGCCAGGCAT  
 GGCTATGAACTGGCCACAGTTTGAGGAGTGGTCTGCAGATCTGAATCGAACTCTCAGCCGGAG  
 AGAGAAGAAGAAGGCTGTTGACGGTGTCAACCCTAACAGGGATCAACCAGACAGGTGACCAGT  
 CTGGACAGAACAAGCCTGGCAGCAACCTTAGTGTCCCGAGCAACCCCGCCCAGTCCACGCAGT  
 TACAGTCCAGCTACAACCCCTTCGAGGACGAGGACGACACGGGCAGCAGCATCAGTGAGAAG  
 GAGGACATTAAGGCCAAAAATGTCAGCAGCTATGAGAAGACTCAGACTTACCCCACTGACTGG  
 TCTGATGATGAGTCTAACAACCCTTTCTCCTCCACGGATGCCAACGGGGATTCTGAACCCATTG  
 ATGAGGACACGACCTCAGGAACAGAAGTGCGAGTTCGGGGCCCTCTATGACTATGAGGGGGCAG  
 GAACATGATGAGCTGAGCTTCAAGGCTGGGGATGAACTGACCAAGATAGAGGATGAAGATGA

ACAGGGTTGGTGCAAGGGACGTTTAGACAGCGGCCAGGTTGGCCTATACCCAGCCAACTATGT  
CGAGGCTATCCAGTGA

**myc-PACSIN2-S313E sequence:**

*ATGGCATCAATGCAGAAGCTGATCTCAGAGGAGGACCTG*CTTATGGCCATGGAGGCCCGAATTCTA**ATGT**  
CTGTCACCTACGATGACTCTGTGGGAGTGGAAGTGTCCAGCGACAGCTTCTGGGAGGTTGGGA  
ACTACAAACGGACTGTGAAGCGGATTGACGATGGCCACCGCCTGTGTGGTGACCTCATGAACT  
GTCTGCATGAGCGGGCACGCATCGAGAAGGCGTATGCACAGCAGCTCACTGAGTGGGCCCCGAC  
GCTGGAGGCAGCTGGTAGAGAAGGGACCACAGTATGGGACCGTGGAGAAGGCCTGGATAGCT  
GTCATGTCTGAAGCAGAGAGGGTGAGTGAAGTGCACCTGGAAGTGAAGGCATCACTGATGAAT  
GAAGACTTTGAGAAGATCAAGAACTGGCAGAAGGAAGCCTTTCACAAGCAGATGATGGGAGG  
CTTCAAGGAGACCAAAGAAGCAGAGGATGGCTTTCGGAAGGCCCAGAAGCCCTGGGCCAAGA  
AGCTGAAAGAGGTGGAAGCGGCAAAGAAGGCGCACCCACACAGCGTGCAAAGAGGAGAAGCT  
GGCCATCTCCCGGGAAGCCAACAGCAAGGCAGATCCATCCCTCAACCCTGAGCAGCTGAAGAA  
ACTGCAAGACAAGATAGAAAAATGCAAACAGGATGTTCTAAAGACCAAGGACAAGTATGAGA  
AGTCCCTGAAGGAGCTTGATCAGACCACACCCCAGTACATGGAGAACATGGAGCAGGTGTTCC  
AGCAGTGCCAGCAGTTTGAAGAGAAGCGCCTGCGCTTCTTCCGGGAGGTTCTGCTGGAGGTTT  
AGAAGCACTTGATCTGTCCAATGTGGCTAGCTATAAAACCATTTACCGGGAGCTGGAGCAGA  
GCATCAAAGCAGCAGATGCGGTAGAGGACCTGAGGTGGTTCCGGGCTAACCATGGGCCAGGC  
ATGGCTATGAACTGGCCACAGTTTGAGGAGTGGTCTGCAGATCTGAATCGAACTCTCGAGCGG  
AGAGAGAAGAAGAAGGCTGTTGACGGTGTCAACCTAACAGGGATCAACCAGACAGGTGACCA  
GTCTGGACAGAACAAAGCCTGGCAGCAACCTTAGTGTCCCGAGCAACCCCGCCAGTCCACGCA  
GTTACAGTCCAGCTACAACCCCTTCGAGGACGAGGACGACACGGGCAGCAGCATCAGTGAGA  
AGGAGGACATTAAGGCCAAAAATGTCAGCAGCTATGAGAAGACTCAGACTTACCCCACTGACT  
GGTCTGATGATGAGTCTAACAACCCCTTCTCCTCCACGGATGCCAACGGGGATTCTGAACCCATT  
TGATGAGGACACGACCTCAGGAACAGAAGTGCGAGTTCGGGCCCTCTATGACTATGAGGGGCA  
GGAACATGATGAGCTGAGCTTCAAGGCTGGGGATGAACTGACCAAGATAGAGGATGAAGATG  
AACAGGGTTGGTGCAAGGGACGTTTAGACAGCGGCCAGGTTGGCCTATACCCAGCCAACTATG  
TCGAGGCTATCCAGTGA

**myc-PACSIN2-S313A sequence:**

*ATGGCATCAATGCAGAAGCTGATCTCAGAGGAGGACCTG*CTTATGGCCATGGAGGCCCGAATTCTA**ATGT**  
CTGTCACCTACGATGACTCTGTGGGAGTGGAAGTGTCCAGCGACAGCTTCTGGGAGGTTGGGA  
ACTACAAACGGACTGTGAAGCGGATTGACGATGGCCACCGCCTGTGTGGTGACCTCATGAACT  
GTCTGCATGAGCGGGCACGCATCGAGAAGGCGTATGCACAGCAGCTCACTGAGTGGGCCCCGAC

GCTGGAGGCAGCTGGTAGAGAAGGGACCACAGTATGGGACCGTGGAGAAGGCCTGGATAGCT  
GTCATGTCTGAAGCAGAGAGGGTGAGTGAAGTGCACCTGGAAGTGAAGGCATCACTGATGAAT  
GAAGACTTTGAGAAGATCAAGAAGTGGCAGAAGGAAGCCTTTCACAAGCAGATGATGGGAGG  
CTTCAAGGAGACCAAAGAAGCAGAGGATGGCTTTCGGAAGGCCCAGAAGCCCTGGGCCAAGA  
AGCTGAAAGAGGGTGGGAAGCGGCAAAGAAGGCGCACCCACACAGCGTGCAAAGAGGAGAAGCT  
GGCCATCTCCCGGGAAGCCAACAGCAAGGCAGATCCATCCCTCAACCCTGAGCAGCTGAAGAA  
ACTGCAAGACAAGATAGAAAAATGCAAACAGGATGTTCTAAAGACCAAGGACAAGTATGAGA  
AGTCCCTGAAGGAGCTTGATCAGACCACACCCCAGTACATGGAGAACATGGAGCAGGTGTTCCG  
AGCAGTGCCAGCAGTTTGAAGAGAAGCGCCTGCGCTTCTTCCGGGAGGTTCTGCTGGAGGTTT  
AGAAGCACTTGATCTGTCCAATGTGGCTAGCTATAAAACCATTTACCGGGAGCTGGAGCAGA  
GCATCAAAGCAGCAGATGCGGTAGAGGACCTGAGGTGGTTCCGGGCTAACCATGGGCCAGGC  
ATGGCTATGAACTGGCCACAGTTTGAAGGAGTGGTCTGCAGATCTGAATCGAACTCTCGCCCGG  
AGAGAGAAGAAGAAGGCTGTTGACGGTGTCAACCTAACAGGGATCAACCAGACAGGTGACCA  
GTCTGGACAGAACAAAGCCTGGCAGCAACCTTAGTGTCCCGAGCAACCCCGCCAGTCCACGCA  
GTTACAGTCCAGCTACAACCCCTTCGAGGACGAGGACGACACGGGCAGCAGCATCAGTGAGA  
AGGAGGACATTAAGGCCAAAAATGTCAGCAGCTATGAGAAGACTCAGACTTACCCCACTGACT  
GGTCTGATGATGAGTCTAACAACCCCTTCTCCTCCACGGATGCCAACGGGGATTCTGAACCCATT  
TGATGAGGACACGACCTCAGGAACAGAAGTGCGAGTTCGGGCCCTCTATGACTATGAGGGGCA  
GGAACATGATGAGCTGAGCTTCAAGGCTGGGGATGAACTGACCAAGATAGAGGATGAAGATG  
AACAGGGTTGGTGCAAGGGACGTTTAGACAGCGGCCAGGTTGGCCTATACCCAGCCAACCTATG  
TCGAGGCTATCCAGTGA

**Table S1.** Characteristics of the individuals with T2D and people without diabetes whose glomeruli were used to define the expression level of total PACSIN2 and pS313-PACSIN2 in figure 2.

|      | Gender (m/f) | Age (y)  | BMI (kg/m <sup>2</sup> ) | Hypertens. med. | Hyperchol. med. |
|------|--------------|----------|--------------------------|-----------------|-----------------|
| Ctrl | 6/5          | 65.7±8.9 | 26.3±4.5                 | 5/11            | 3/11            |
| T2D  | 8/2          | 74.4±9.5 | 28.9±5.5                 | 9/10            | 4/10            |

\* Hypertens. med.: medication for hypertension, hyperchol. med.: medication for hypercholesterolemia

**Table S2.** Characteristics of the individuals with T2D whose sera were used to stimulate podocytes in figure 2.

|           | Age (y)  | BMI (kg/m <sup>2</sup> ) | Hypertens. med. | Hyperchol. med. | Glucose (mmol/L) | HBA1c (%) | Chol. (mmol/dL) | HDL (mmol/dL) | Trigly. (mmol/dL) |
|-----------|----------|--------------------------|-----------------|-----------------|------------------|-----------|-----------------|---------------|-------------------|
| Normoalb. | 66.0±2.2 | 32.3±7.6                 | 8/10            | 8/10            | 6.22±2.08        | 7.26±0.96 | 4.01±0.82       | 1.56±0.44     | 1.09±0.33         |
| Microalb. | 61.0±5.1 | 34.9±4.3                 | 9/10            | 8/10            | 7.08±0.92        | 7.79±1.58 | 4.17±0.65       | 1.27±0.38     | 1.70±1.06         |

\* Normoalb.: normoalbuminuria, Microalb.: microalbuminuria, Hypertens. med.: medication for hypertension, Hyperchol. med.: medication for hypercholesterolemia, HBA1c: glycated haemoglobin A1c, Chol.: cholesterol, HDL: high-density lipoproteins, Trigly.: triglycerides

**Table S3.** Descriptive statistics for cell size analysis Figure 5G.

|                    | GFP-EV |             | GFP-WT |             | GFP-S313E |             | GFP-S313A |             |
|--------------------|--------|-------------|--------|-------------|-----------|-------------|-----------|-------------|
|                    | DMSO   | wiskostatin | DMSO   | wiskostatin | DMSO      | wiskostatin | DMSO      | wiskostatin |
| Number of values   | 198    | 147         | 28     | 52          | 110       | 31          | 69        | 134         |
| Minimum            | 207.1  | 206.9       | 262.6  | 686.2       | 217.3     | 755.2       | 551.9     | 151.5       |
| Maximum            | 10305  | 58183       | 29537  | 50628       | 146870    | 54069       | 50392     | 60879       |
| Range              | 10098  | 57976       | 29274  | 49942       | 146653    | 53314       | 49840     | 60727       |
| Mean               | 2747   | 2550        | 10135  | 9247        | 7905      | 9485        | 8445      | 4381        |
| Std. Deviation     | 1694   | 5425        | 8974   | 9675        | 16468     | 11189       | 9954      | 7326        |
| Std. Error of Mean | 120.4  | 447.4       | 1696   | 1342        | 1570      | 2010        | 1198      | 632.9       |

**Table S4.** Descriptive statistics for cell size analysis Figure 7B.

|                      | GFP-EV | GFP-WT | GFP-S313E | GFP-S313A |
|----------------------|--------|--------|-----------|-----------|
| Number of values     | 1098   | 436    | 895       | 901       |
| Minimum              | 0.000  | 0.000  | 0.000     | 0.000     |
| Maximum              | 423.0  | 935.0  | 625.0     | 710.0     |
| Range                | 423.0  | 935.0  | 625.0     | 710.0     |
| Mean                 | 62.18  | 98.55  | 70.61     | 70.16     |
| Std. Deviation       | 44.11  | 81.87  | 56.57     | 56.42     |
| Std. Error of Mean   | 1.331  | 3.921  | 1.891     | 1.879     |
| Lower 95% CI of mean | 59.57  | 90.84  | 66.90     | 66.48     |
| Upper 95% CI of mean | 64.79  | 106.3  | 74.32     | 73.85     |

**Table S5.** Descriptive statistics for focal adhesion number analysis Figure 7D.

|                      | GFP-EV | GFP-WT | GFP-S313E | GFP-S313A |
|----------------------|--------|--------|-----------|-----------|
| Number of values     | 1098   | 436    | 895       | 901       |
| Minimum              | 0.000  | 0.000  | 0.000     | 0.000     |
| Maximum              | 423.0  | 935.0  | 625.0     | 710.0     |
| Range                | 423.0  | 935.0  | 625.0     | 710.0     |
| Mean                 | 62.18  | 98.55  | 70.61     | 70.16     |
| Std. Deviation       | 44.11  | 81.87  | 56.57     | 56.42     |
| Std. Error of Mean   | 1.331  | 3.921  | 1.891     | 1.879     |
| Lower 95% CI of mean | 59.57  | 90.84  | 66.90     | 66.48     |
| Upper 95% CI of mean | 64.79  | 106.3  | 74.32     | 73.85     |

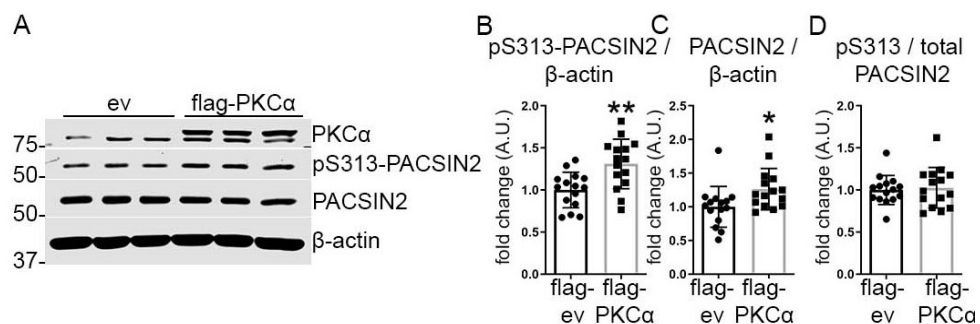

**Figure S1.** PKC $\alpha$  regulates PACSIN2 expression and phosphorylation. (A–D) Quantification of Western blots of total PACSIN2, pS313-PACSIN2 (A) in lysates from proliferating human podocytes transiently overexpressing flag-ev or flag-PKC $\alpha$  shows increased expression of PACSIN2 (C) and phosphorylation at S313 (B) in podocytes overexpressing flag-PKC $\alpha$  to ev control.  $\beta$ -actin is used as a loading control.  $n=15$  from 5 independent experiments in B,  $n=9$  from 3 independent experiments in C–E, and  $n=15$  from 5 independent experiments. \*:  $p<0.05$ , \*\*:  $p<0.01$  vs ev.

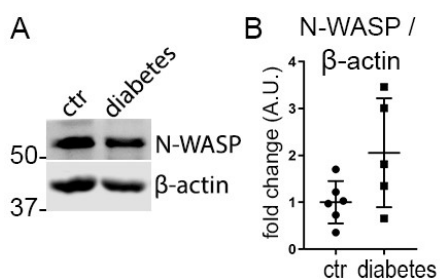

**Figure S2.** N-WASP tends to increase in the glomeruli of individuals with T2D. (A,B) Quantification of Western blots of N-WASP (A) in lysates of glomeruli isolated from individuals with T2D shows a trend of increase in the expression N-WASP normalized to  $\beta$ -actin in individuals with T2D compared to controls (ctr) (B).  $n=6$  in ctr and 6 in diabetes.

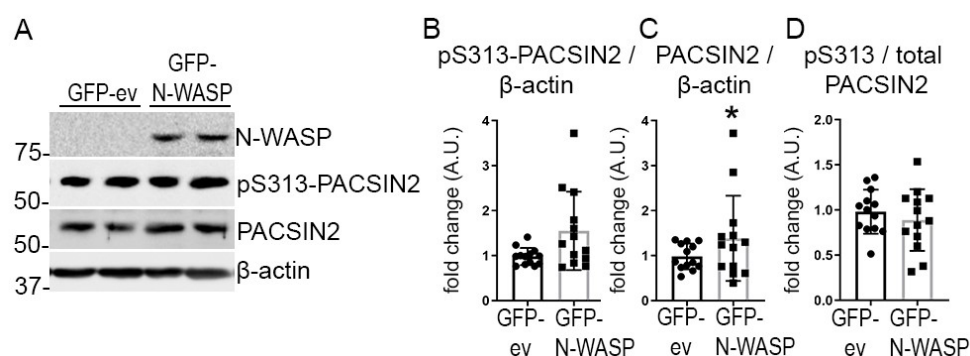

**Figure S3.** N-WASP regulates PACSIN2. **(A–D)** Quantification of Western blots of total PACSIN2 and pS313-PACSIN2 (A) in lysates from proliferating human podocytes transiently overexpressing GFP-empty vector (GFP-ev) or GFP-N-WASP shows increased expression of PACSIN2 (C) in podocytes overexpressing GFP-N-WASP in comparison to empty vector control. β-actin is used as a loading control. n=13 from 4 independent experiments \*:  $p < 0.05$  vs ev.

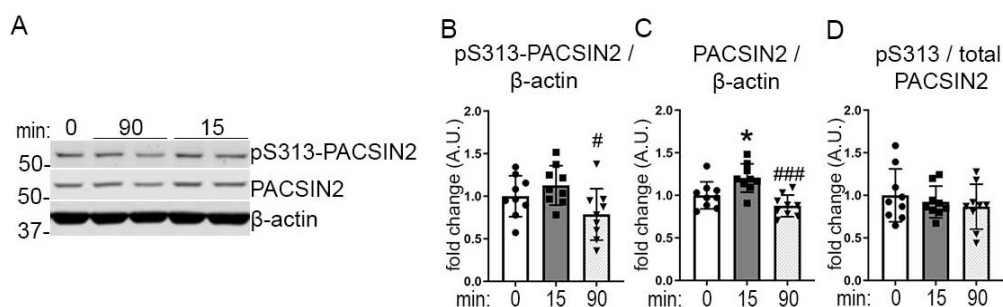

**Figure S4.** PACSIN2 expression and phosphorylation vary during the recovery from cytochalasin D. **(A–D)** Quantification of Western blots of total PACSIN2 and pS313-PACSIN2 (A) in lysates from differentiated human podocytes after treatment with cytochalasin D and washout showing that expression of PACSIN2 increases 15 min after washout and decreases after 90 min (C), whereas as pS313-PACSIN2 decreases after 90 min (A). β-actin is used as a loading control. n=9 from 3 independent experiments. \*\* vs 0 min. # vs 15 min. \*:  $p < 0.05$ , #:  $p < 0.05$ , ###:  $p < 0.001$ .
